# Supplementary figures and images for: Prevention of Cell Death by Activation of Hydroxycarboxylic Acid Receptor 1 (GPR81) in Retinal Explants
Source: MDPI journal article supplement (doi:10.3390/cells11132098), 2022-07-02

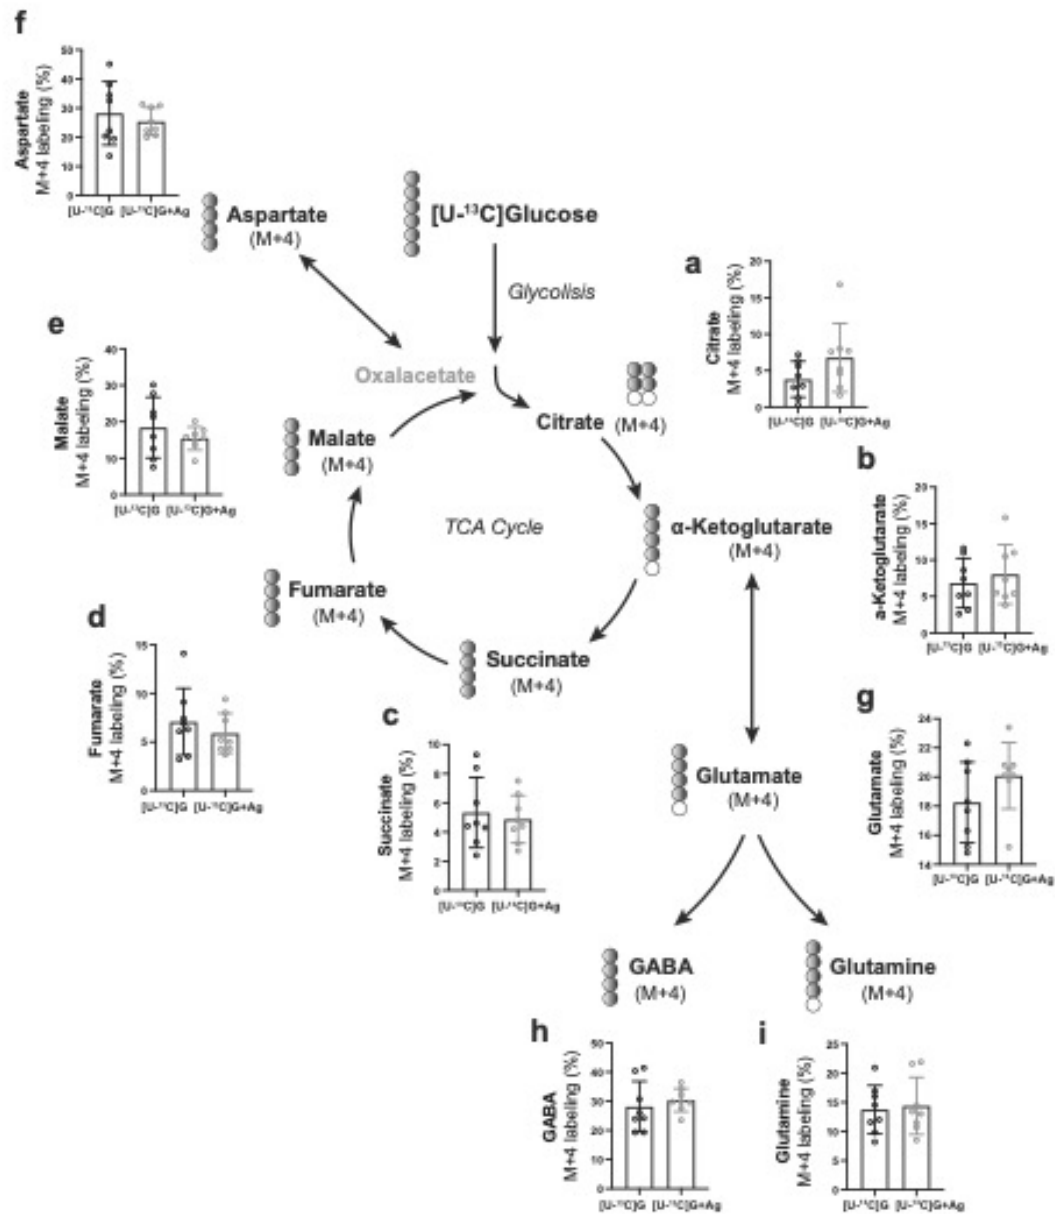

Figure S1: Retinal metabolism of [U-<sup>13</sup>C] glucose in response to 3,5-DHBA (Ag) treatment (M+4).

Supplement: s1 [file s1]
